# Supplementary material for: The role of complement activation in rhabdomyolysis-induced acute kidney injury
Source: PLOS journal article supplement (doi:10.1371/journal.pone.0192361), 2018-02-21
Supplement: S2 (10.1371/journal.pone.0192361.s002) [file journal.pone.0192361.s002]

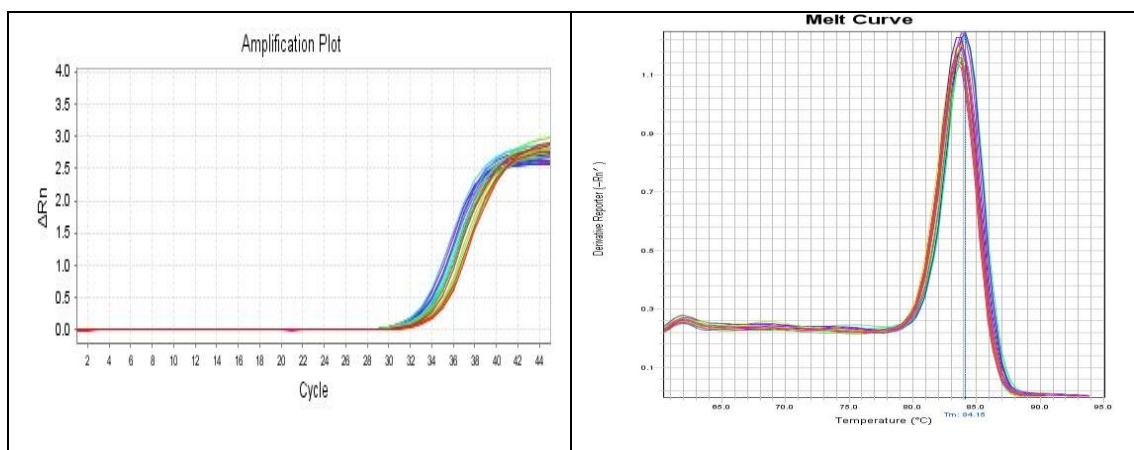

**Figure A** The amplification curve and melt curve of C1q mRNA

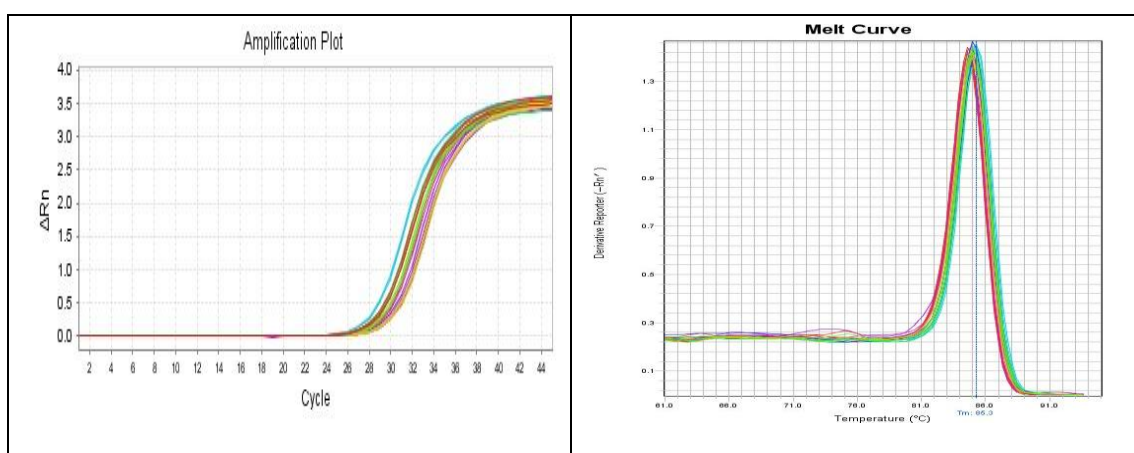

**Figure B** The amplification curve and melt curve of fB mRNA

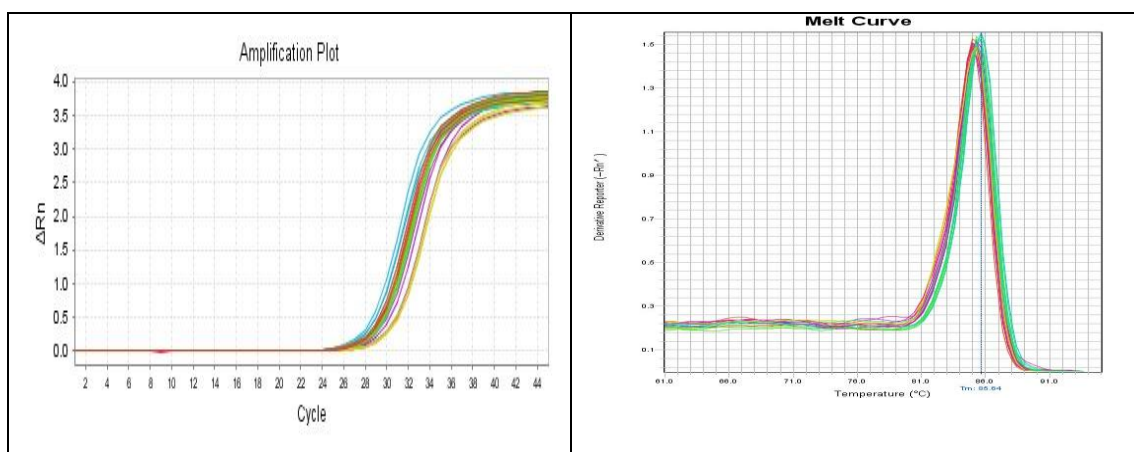

**Figure C** The amplification curve and melt curve of MBL-A mRNA

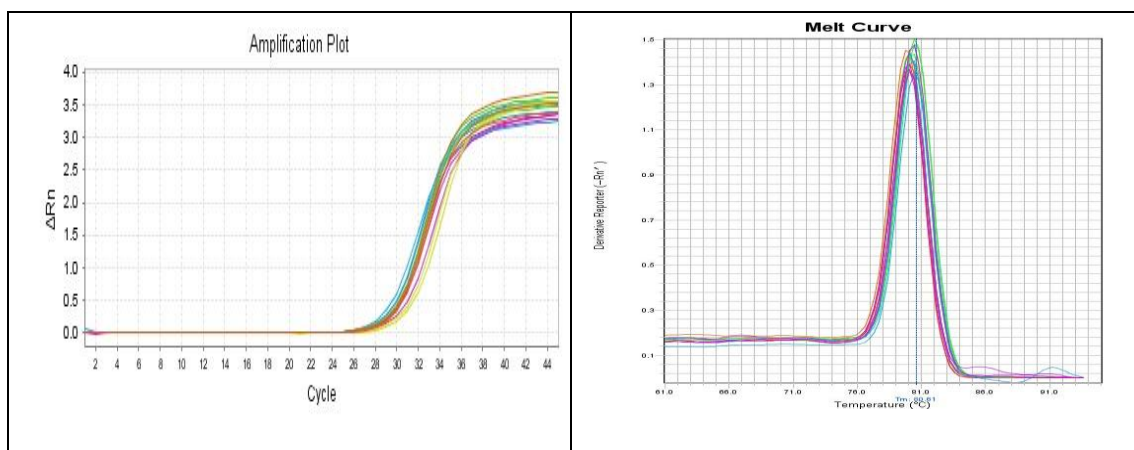

**Figure D** The amplification curve and melt curve of IL-6 mRNA

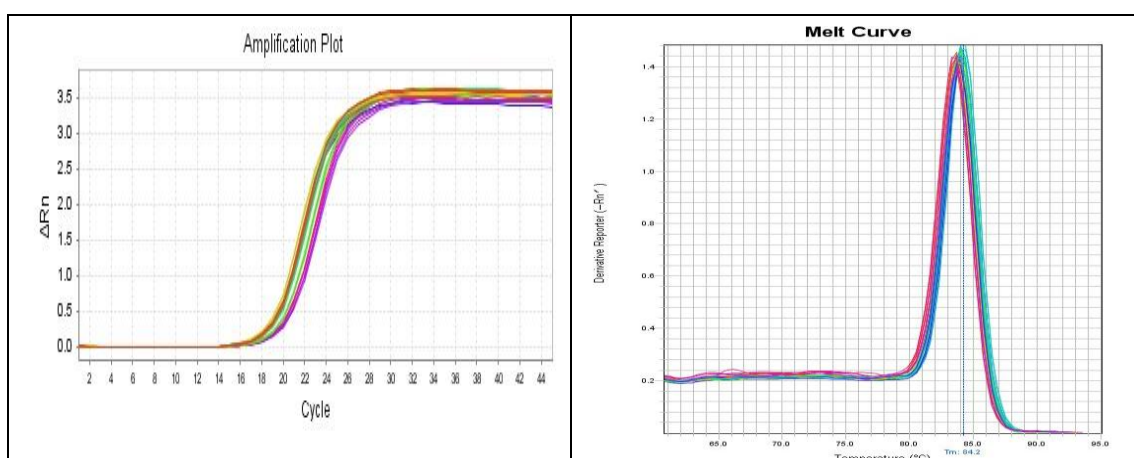

**Figure E** The amplification curve and melt curve of GAPDH
